# Supplementary material for: Routine blood tests and probability of cancer in patients referred with non-specific serious symptoms: a cohort study
Source: PubMed Central journal article supplement (PMC5715646; doi:10.1186/s12885-017-3845-9), 2017-12-04

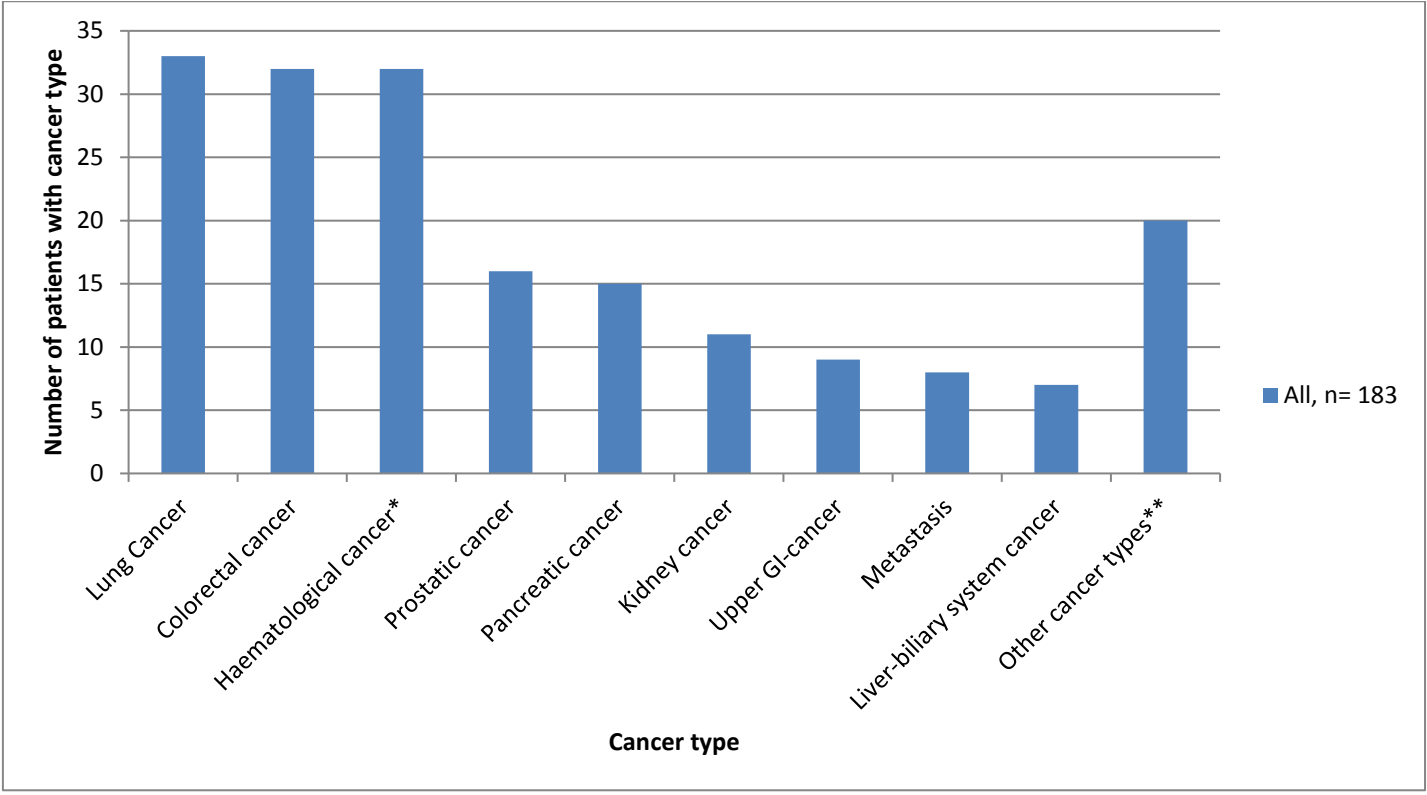

Supplement: 12885_2017_3845_MOESM2_ESM.pdf [file 12885_2017_3845_MOESM2_ESM.pdf]
